# Supplementary material for: The oceanic cycle of carbon monoxide and its emissions to the atmosphere
Source: Copernicus journal article supplement (doi:10.5194/bg-2018-410), 2018-09-27
Supplement: Supplementary file 1 [file bg-2018-410-supplement.pdf]

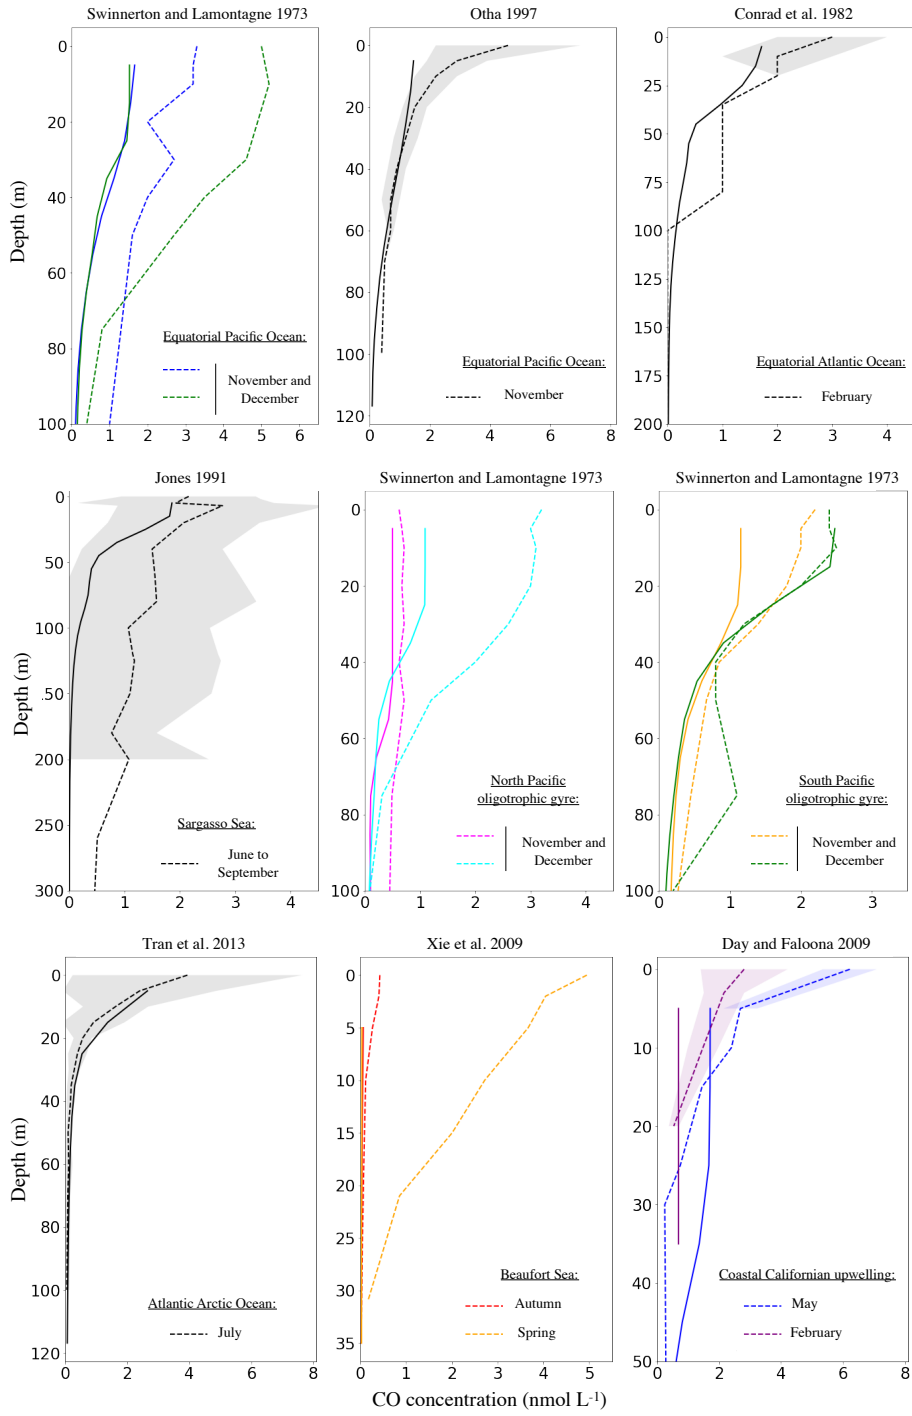

**Supplement: comparison of simulated oceanic CO profiles with the measured ones (for the same months and location). Dotted lines represent the observed profiles and continuous lines the model output. The standard deviation of the observation, when available, is shown around each observed profiles with the shaded area of the same color.**
